1 **Scent dog identification of SARS-CoV-2 infections, similar across different body fluids**

2 Paula Jendryn<sup>a^</sup>, Friederike Twele<sup>a^</sup>, Sebastian Meller<sup>a^</sup>, Claudia Schulz<sup>b</sup>, Maren von  
3 Köckritz-Blickwede<sup>b,d</sup>, Ab Osterhaus<sup>b</sup>, Hans Ebbers<sup>c</sup>, Janek Ebbers<sup>c</sup>, Veronika Pilchová<sup>b</sup>,  
4 Isabell Pink<sup>e</sup>, Tobias Welte<sup>e</sup>, Michael Peter Manns<sup>f</sup>, Anahita Fathi<sup>g,h,i</sup>, Marylyn Martina  
5 Addo<sup>g,h,i</sup>, Christiane Ernst<sup>j</sup>, Wencke Schäfer<sup>k</sup>, Michael Engels<sup>k</sup>, Anja Petrov<sup>l</sup>, Katharina  
6 Marquart<sup>l</sup>, Ulrich Schotte<sup>l</sup>, Esther Schalke<sup>k</sup> and Holger Andreas Volk<sup>a\*</sup>

7

8 <sup>a</sup> Department of Small Animal Medicine and Surgery, University of Veterinary Medicine  
9 Hannover, Bünteweg 9, 30559 Hannover, Germany

10 <sup>b</sup> Research Center for Emerging Infections and Zoonoses, University of Veterinary Medicine  
11 Hannover, Bünteweg 17, 30559 Hannover, Germany

12 <sup>c</sup> KynoScience UG, Am Teutohang 51, 48477 Hörstel, Germany

13 <sup>d</sup> Department of Biochemistry, University of Veterinary Medicine Hannover, Bünteweg 17,  
14 30559 Hannover, Germany

15 <sup>e</sup> Department of Respiratory Medicine, Hannover Medical School, Carl-Neuberg-Straße 1,  
16 30625 Hannover, Germany

17 <sup>f</sup> Hannover Medical School, Carl-Neuberg-Straße 1, 30625 Hannover, Germany

18 <sup>g</sup> Department of Medicine, Division of Infectious Diseases, University Medical-Center  
19 Hamburg-Eppendorf, Martinistrasse 52, 20246 Hamburg, Germany

20 <sup>h</sup> Department for Clinical Immunology of Infectious Diseases, Bernhard Nocht Institute for  
21 Tropical Medicine, Bernhard-Nocht-Straße 74, 20359 Hamburg, Germany

22 <sup>i</sup> German Center for Infection Research, Hamburg-Lübeck-Borstel-Riems, Germany

23 <sup>j</sup> Bundeswehr Medical Service Headquarters, Koblenz, Germany

24 <sup>k</sup> Bundeswehr School of Dog handling, Gräfin-Maltzan-Kaserne, Hochstraße, 56766 Ulmen,  
25 Germany

26 <sup>l</sup> Central Institute of the Bundeswehr Medical Service Kiel, Kronshagen, Germany

27 ^these authors contributed equally to this work

28 \* Corresponding author: Holger A. Volk, Department of Small Animal Medicine and Surgery,

29 University of Veterinary Medicine Hannover, Bünteweg 9, 30559 Hannover, Germany,

30 holger.volk@tiho-hannover.de

31 **ABSTRACT**

32 **Background:**

33 The main strategy to contain the current SARS-CoV-2 pandemic remains to implement a  
34 comprehensive testing, tracing and quarantining strategy until vaccination of the population is  
35 adequate.

36 **Methods:**

37 Ten dogs were trained to detect SARS-CoV-2 infections in beta-propiolactone inactivated  
38 saliva samples. The subsequent cognitive transfer performance for the recognition of non-  
39 inactivated samples were tested on saliva, urine, and sweat in a randomised, double-blind  
40 controlled study.

41 **Results:**

42 Dogs were tested on a total of 5242 randomised sample presentations. Dogs detected non-  
43 inactivated saliva samples with a diagnostic sensitivity of 84% and specificity of 95%. In a  
44 subsequent experiment to compare the scent recognition between the three non-inactivated  
45 body fluids, diagnostic sensitivity and specificity were 95% and 98% for urine, 91% and 94%  
46 for sweat, 82%, and 96% for saliva respectively.

47 **Conclusions:**

48 The scent cognitive transfer performance between inactivated and non-inactivated samples as  
49 well as between different sample materials indicates that global, specific SARS-CoV-2-  
50 associated volatile compounds are released across different body secretions, independently  
51 from the patient's symptoms.

52 **Funding:**

53 The project was funded as a special research project of the German Armed Forces.

54 The funding source DZIF- Fasttrack 1.921 provided us with means for biosampling.

55

56

57 **Key words**

58 **COVID-19; SARS-CoV-2; Volatile organic compounds; Scent detection dogs; Olfactory**  
59 **detection; Saliva; Urine; Sweat**

60

61 **Introduction**

62 **Current situation**

63 The recently emerged respiratory disease coronavirus disease 2019 (COVID-19) broke out in  
64 Wuhan, Hubei Province of the People's Republic of China, for the first time in December 2019  
65 and was declared a global health emergency by the World Health Organization at the end of  
66 January 2020<sup>1,2</sup>. It rapidly developed into a global pandemic within just a few months. The  
67 pandemic has led to enormous restrictions and sanctions affecting public as well as private life.  
68 The severe acute respiratory syndrome coronavirus 2 (SARS-CoV-2), which causes COVID-  
69 19, infects the upper respiratory tract and in more serious cases may also cause severe  
70 pneumonia and acute respiratory distress syndrome. The clinical presentation of SARS-CoV-2  
71 infection is heterogeneous, ranging from asymptomatic infection to typical symptoms such as  
72 fever, cough, fatigue, ageusia and anosmia, but may also present atypically and lead to  
73 multiorgan dysfunction and death<sup>1,3,4</sup>. Containing this global pandemic requires a high rate of  
74 testing, as an effective tool to contain viral spread. Viral loads can be detected by reverse  
75 transcription polymerase chain reaction (RT-PCR) assays and with slightly less sensitive and  
76 usually more rapid antigen detection tests in nasal or pharyngeal swabs<sup>2,4</sup> and saliva<sup>5,6,7</sup> with a  
77 peak at days three to ten after infection. The peak of infectiousness is around symptom onset<sup>8</sup>.  
78 It remains unclear if sweat or urine are also sources of virus transmission<sup>9,10</sup>.

79 **Odour detection**

80 Different infectious diseases may cause specific odours by emanating volatile organic  
81 compounds (VOCs). These are metabolic products, primarily produced by cell metabolism and

82 released through breath, saliva, sweat, urine, faeces, skin emanations and blood<sup>11</sup>. The VOC-  
83 pattern reflects different metabolic states of an organism, so it could be used for medical  
84 diagnosis by odour detection and disease outbreak containment<sup>12</sup>.

85 Canines are renowned for their extraordinary olfactory sense, being deployed as a reliable tool  
86 for real-time, mobile detection of, e.g., explosives, drugs and may identify certain pathogen-  
87 and disease-specific VOCs produced by infected body cells. The limit of detection for canines  
88 is at concentrations of one part per trillion, which is three orders of magnitude more sensitive  
89 than currently available instruments<sup>12</sup>. Consequently various studies have shown dogs' abilities  
90 to detect with high rates of sensitivity and specificity<sup>13</sup> infectious and non-infectious diseases  
91 and conditions, such as different types of cancer<sup>14</sup>, malaria<sup>15</sup>, bacterial infections caused by e.g.  
92 *Clostridium difficile* or mastitis causing pathogens<sup>16,17</sup>, hypoglycaemia in diabetics<sup>18</sup>, and virus  
93 infections in cell cultures<sup>12,19</sup>. In addition, several research groups worldwide currently train  
94 and deploy SARS-CoV-2 detection dogs<sup>20,21</sup>. In a pilot study, our group showed that dogs were  
95 able to detect inactivated saliva samples from COVID-19 patients with a sensitivity of 83% and  
96 specificity of 96%<sup>22</sup>, which has been confirmed by other groups training dogs to detect either  
97 respiratory secretions or sweat samples from COVID-19 patients<sup>20,21</sup>. Despite these preliminary  
98 promising results, it remains to be shown whether dogs detect VOCs which are biofluid-specific  
99 or alternatively there is a more general change in odour of COVID-19 patients. To test the latter  
100 hypothesis, the current study used the same training set-up with inactivated saliva samples as  
101 the former study<sup>22</sup> and investigated whether dogs could transfer their smell recognition to non-  
102 inactivated saliva, urine or sweat samples from SARS-CoV-2 infected patients. Scent detection  
103 dogs could be a reasonable option for a first line screening method in public facilities such as  
104 airports or during major events as well as in retirement homes or medical institutions that would  
105 be real-time, effective, economical, effortless and non-invasive.

## 106 **Methods**

107 **Samples - target scent, negative controls and distractors**

108 To acquire saliva samples, individuals had to salivate about 1-3 ml through a straw into sample  
109 tubes. For the training phase, saliva samples from twelve subjects (hospitalised and non-  
110 hospitalised SARS-CoV-2 infected individuals) suffering from asymptomatic to severe  
111 COVID-19 symptoms were inactivated with beta-propiolactone (BPL) according to the  
112 protocol described in Jendry et al. 2020 to provide safe training conditions for dogs and  
113 handlers. To generate sweat samples, the test persons had to wipe their crook of the arm with a  
114 cotton pad. Urine samples were collected from the test persons by urinating into a cup and  
115 transfer of 5 ml into a sample tube. After acquisition, all of the samples were deep-frozen at -  
116 80°C in the laboratory until usage. Samples from ninety-three participants were used in the  
117 study (**suppl. table 1**). The SARS-CoV-2 status of each collected sample was determined by  
118 the RT-PCR SARS-CoV-2-IP4 assay from Institut Pasteur including an internal control system  
119 and protocol<sup>22,23</sup>.

120 In contrast to our first study<sup>24</sup>, which only included hospitalised COVID-19 patients suffering  
121 from severe courses of disease, we now additionally included non-hospitalised asymptomatic  
122 individuals as well as individuals with mild clinical signs. Inclusion criteria were either the  
123 diagnosis of infection by positive SARS-CoV-2 RT-PCR of nasopharyngeal swabs (positive  
124 samples), negative SARS-CoV-2 RT-PCR result and healthy condition (negative control  
125 samples) or negative SARS-CoV-2 RT-PCR result and symptoms of other respiratory disease  
126 (distractor samples). Written consent from all participants were collected before sample  
127 collection. The local Ethics Committees of *Hannover Medical School* (MHH) and the Hamburg  
128 Medical Association (for the *University Medical-Center Hamburg-Eppendorf* (UKE))  
129 approved the study (ethic consent number 9042\_BO\_K\_2020 and PV7298, respectively).

130 To ensure safety for presentation of non-inactivated samples, glasses specially designed for  
131 scent dog training (Training Aid Delivery Device (*TADD*), Sci-K9, USA) containing an odour-  
132 permeable but hydro- and oleophobic fluoropolymer membrane were used. A 1 x 1 x 0.5 cm

133 cotton pad soaked with 100 µl of fluid sample material or a snippet of the cotton pad used for  
134 sweat sampling was placed at the bottom of the *TADD*-glass and the glass was safely sealed in  
135 the laboratory under biosafety level 3 laboratory conditions.

### 136 **Dogs**

137 All ten dogs were German armed forces' service dogs with a history of either protection work,  
138 explosives detection or no previous training except for obedience (**suppl. table 2**). Involved  
139 dog breeds were Malinois (n=5), Labrador Retriever (n=3), German Shepherd (n=1) and a  
140 Dutch shepherd crossbreed dog (n=1) with ages ranging between one and nine years (median  
141 age= 3.7 years). Six female and four male dogs were included.

### 142 **Testing device**

143 For the detection training and testing, a device called 'Detection Dog Training System' (DDTS,  
144 Kynoscience UG, Hörstel, Germany) was utilised, which provided automated and randomised  
145 sample presentations for the dogs as well as automatic rewards as described previously<sup>24</sup>. The  
146 recorded results were verified by manual video analysis.

### 147 **Training procedure**

148 The training procedure was exclusively based on positive reinforcement. Dogs were  
149 familiarised to the DDTS for six days using a replacement odour, followed by specific training  
150 for 8 days to condition them for the scent of SARS-CoV-2 infections in twelve inactivated  
151 positive saliva samples and negative control samples from healthy individuals, respectively.  
152 The final study was conducted on four days (four hours a day) and included non-inactivated  
153 saliva samples as well as urine and sweat samples. All of the samples used in the final study  
154 had not been presented to the dogs before.

### 155 **Study design of the double-blinded study**

156 The study was conducted in compliance with safety and hygiene regulations according to the  
157 recommendations of the Robert Koch Institute (Berlin, Germany), and approved by local  
158 authorities (regional health department and state inspectorate's office; Hannover, Germany).

159 All samples were handled by the same person with personal protective equipment including  
160 powder-free nitrile gloves to prevent odour contamination which may irritate the dogs. In the  
161 first session non-inactivated saliva samples were used to assess whether dogs were able to  
162 transfer their trained sniffing performance from inactivated to non-inactivated saliva samples.  
163 In the following sessions, the detection performances for non-inactivated sweat, urine, and,  
164 again, saliva samples were evaluated. There were four possibilities for the dogs to respond to  
165 the presented odours:

- 166 1. True positive (TP): the dog correctly indicates a SARS-CoV-2 positive sample
- 167 2. False positive (FP): the dog incorrectly indicates a negative control or distractor
- 168 3. True negative (TN): the dog sniffs shortly at a negative sample but correctly does not  
169 indicate it
- 170 4. False negative (FN): the dog sniffs shortly at a positive sample but does not indicate it

171 A detection trial was considered accomplished if the dog left his snout in the target scent  
172 presenting hole for  $\geq 2$  sec, initiating automatically the next trial. In each trial, the device's  
173 software randomly assigned the target scent's position between the seven different positions  
174 without the dog or its handler knowing which hole was next positive. The results were  
175 recorded electronically for subsequent analysis and verified by manual time-stamped video  
176 analysis. The standard temperature in the dog training laboratory was controlled at  $24 \pm 1^\circ\text{C}$ .

177 Although the samples were presented to the dogs in safe specimen vessels (*TADD*-glasses), the  
178 detection experiments with infectious material were performed in a biosafety level 2 laboratory  
179 to prevent any risk of infection. After leaving the test room, the canines were washed with 4%  
180 chlorhexidine shampoo with at least ten min contact time to prevent any potential  
181 environmental contamination and virus spread. The equipment was disinfected after each test



182 day with suitable disinfectant wipes soaked in limited virucidal disinfectant solution. In  
183 addition, swab samples of the dogs' noses and from the outside of *TADD*-membranes were taken  
184 after each day of testing and examined with RT-PCR-assays at the Central Institute of the  
185 Bundeswehr Medical Service or Research Center for Emerging Infections and Zoonoses to  
186 exclude contamination and replication with infectious viral particles in the dogs' noses or an  
187 escape of virus-containing material from the vessel (**suppl. table 3**).

### 188 **Analysis of sensitivity and specificity**

189 The diagnostic sensitivity as well as diagnostic specificity, positive predictive values (PPV),  
190 and negative predictive values (NPV) were calculated according to Trevethan<sup>25</sup>. 95%  
191 confidence intervals (CIs) for sensitivity and specificity were calculated with the Wilson  
192 Score Method<sup>26</sup>. In addition, medians of sensitivity, specificity, PPV, NPV, and accuracy with  
193 corresponding 95% CIs of median were calculated. All calculations were done with the Prism  
194 9 software from GraphPad (La Jolla, CA, USA).

### 195 **Results**

196 When non-inactivated saliva samples were presented to the dogs after training with inactivated  
197 saliva samples, dogs were able to discriminate between samples of infected (RT-PCR positive),  
198 non-infected (RT-PCR negative) individuals and distractor samples (RT-PCR negative but  
199 respiratory symptoms) with a diagnostic sensitivity of 84% (95% CI: 62.5–94.44%) and  
200 specificity of 95% (95% CI: 93.4–96%). During the following detection sessions, when the  
201 device was equipped with non-inactivated samples with the same body fluid (saliva, sweat or  
202 urine), the corresponding values for diagnostic sensitivity and specificity for saliva samples  
203 were 82% (95% CI: 64.29–95.24%) and 96% (95% CI: 94.95–98.9%), for sweat samples 91%  
204 (95% CI: 71.43–100%) and 94% (95% CI: 90.91–97.78%), and for urine samples 95% (95%  
205 CI: 66.67–100%) and 98% (95% CI: 94.87–100%) respectively (**Fig. 1, suppl. table 4**).

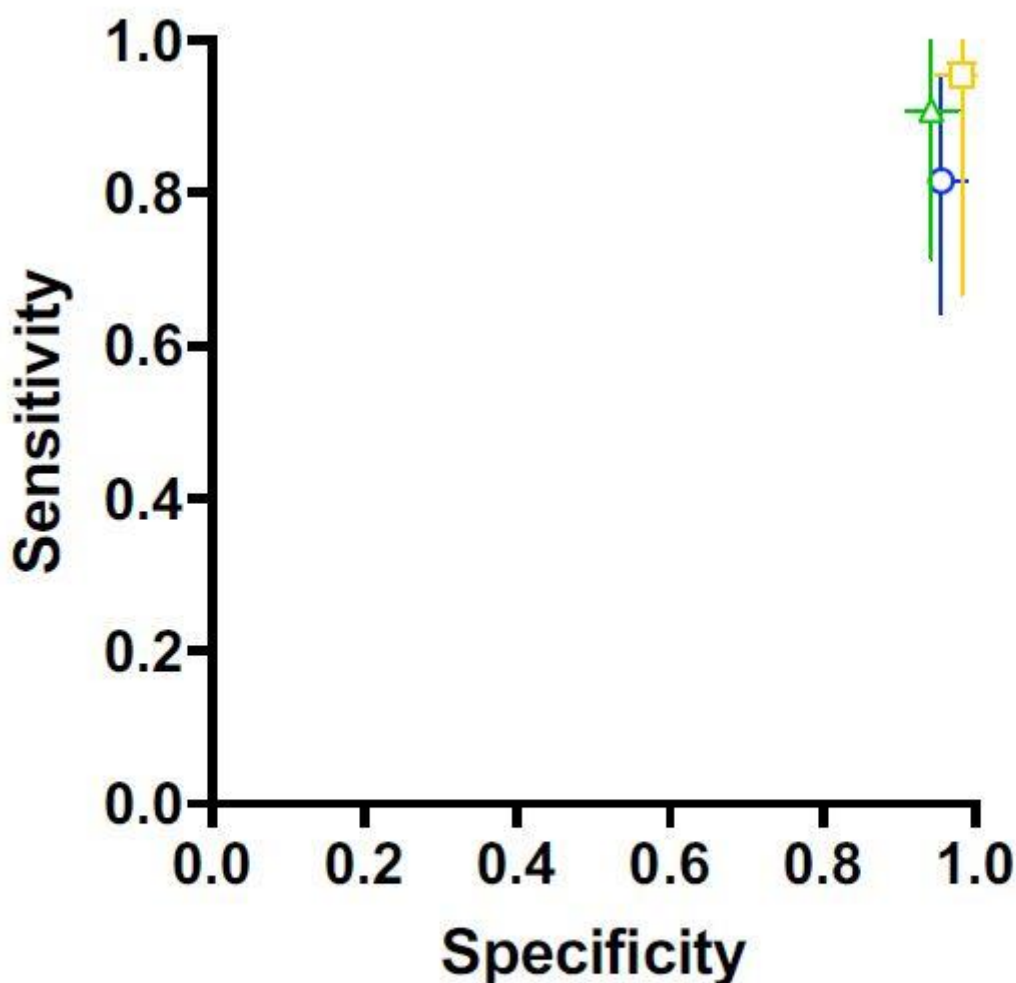

**Figure 1.** Median diagnostic specificity and sensitivity for all dogs for non-inactivated sweat (green triangle), urine (yellow square), and saliva (blue circle) samples, respectively. The 95% confidence intervals of the medians for specificity and sensitivity are shown with horizontal and vertical bars, respectively.

206

207 During the presentation of 5308 randomised sample presentations, the overall success rate was  
208 92% with 723 correct indications of positive, 4140 correct rejections of negative or distractors,  
209 214 incorrect indications of negative and incorrect rejections of 231 positive sample  
210 presentations (**Suppl. table 5**). The RT-PCR results of the sample material from participants  
211 with a diagnosed SARS-CoV-2 infection via nasopharyngeal swab and RT-PCR were only  
212 positive in twelve cases. Nasopharyngeal swabs from each dog, as well as from the outside of  
213 the membranes taken after each day of testing were all negative.

214

## 215 **Discussion**

216 Fast, rapid, affordable and accurate identification of SARS-CoV-2 infected individuals remains  
217 pivotal not only for limiting the spread of the current pandemic, but also for providing a tool to  
218 limit the impact on public health and the economy. Data from the current scent dog detection  
219 study confirm our former pilot study (sensitivity 84% versus 83% and specificity 95% versus  
220 96%, respectively). In the current study, dogs were after only eight days of training not only  
221 able to immediately transfer their scent detection abilities from inactivated to non-inactivated  
222 saliva samples, but also to sweat and urine, with urine having the highest sensitivity of 95% and  
223 specificity of 98%. These results suggest a general, non-cell specific, robust VOC-pattern  
224 generation in SARS-CoV-2 infected individuals and provide further evidence that detection  
225 dogs could provide a reliable screening method providing immediate results.

226 In the former pilot study from our group<sup>24</sup>, only BPL-inactivated samples of COVID-19 patients  
227 and controls were used. The first step in the current trial was therefore to evaluate if dogs can  
228 transfer scent recognition to non-inactivated saliva samples, even when trained only with  
229 inactivated samples. The inactivation process with BPL did not impair the SARS-CoV-2-  
230 associated scent of the samples, as dogs were able to discriminate with a similar accuracy  
231 between inactivated and non-inactivated saliva samples from SARS-CoV-2 infected individuals  
232 and controls. This has huge implications for the training of dogs, as the health and safety  
233 measures other groups had to follow when using non-inactivated samples can be overcome by  
234 using BPL-inactivation. Data from the current study indicate that dogs can familiarise to a  
235 training device and be safely trained within little more than a week by using inactivated saliva  
236 samples from SARS-CoV-2 positive individuals and controls and become reliable SARS-CoV-  
237 2 detection dogs for untreated samples. Furthermore, the safety of working with the TADD-  
238 glasses was also confirmed by negative PCR results of the samples attained (canine  
239 nasopharynx and outer TADD-glas-membrane).

240

241 In a second step, untreated (non-inactivated) saliva, sweat and urine samples were presented to  
242 the dogs separately to evaluate if they can transfer scent recognition from saliva samples to  
243 other untreated body fluids. The detection rate for this experiment was also high, especially  
244 considering the dogs having not been trained with sweat or urine samples before. In order to  
245 eliminate the risk of recognizing an individual odour from a specific subject, samples used were  
246 different for each session.

247 The sample material of the individuals with positive SARS-CoV-2 status (nasopharyngeal swab  
248 tested positive via RT-PCR) was predominantly RT-PCR negative which means that dogs are  
249 able to detect the changes in metabolism of non-infectious secretions of SARS-CoV-2 infected  
250 individuals. This could explain some of the anecdotal reports from the scent detection work at  
251 Helsinki airport that dogs were able to detected asymptomatic SARS-CoV-2 infected  
252 individuals prior of them shedding virus.

253 The fact that dogs were able to discriminate successfully between positive, negative samples  
254 and distractors represents evidence of a successful discrimination process, whereas the  
255 detection ability across three bodyfluids from 93 different individuals indicates a successful  
256 generalisation process. Several research groups that currently also train SARS-CoV-2 sniffer  
257 dogs achieved good results, which support this work and consolidate the reliability of the  
258 canines' olfactory sense for medical purposes. Grandjean et al. (2020) trained six dogs in one  
259 to three weeks using sweat samples and achieved success rates between 76 to 100%<sup>20</sup>. In  
260 addition to their work, where only sweat samples from hospitalised patients were used, the  
261 current study suggests that also asymptomatic SARS-CoV-2 infected individuals can be  
262 detected by the dogs. Our dogs were able to identify different COVID-19 disease phenotypes  
263 and phases of disease expression (sore throat, cough, cold, headache and aching limbs, fever,  
264 loss of smell and taste and/or severe pneumonia). Another scent dog detection study conducted  
265 by Vesga et al. (2020) achieved promising results (95.5% average sensitivity and 99.6%

266 specificity) and also planned real-life experiments<sup>21</sup>. These studies support the evidence of  
267 canines offering a reliable screening method for SARS-CoV-2 infections. Future studies are  
268 important to address some remaining limitations such as the low number of distractor samples  
269 with specified pathogens (differentiation to other lung diseases or pathogens such as infections  
270 with other seasonal respiratory viruses, like influenza viruses, rhinoviruses, respiratory  
271 syncytial virus, human metapneumovirus, adenovirus, and coronaviruses other than SARS-  
272 CoV-2). This was however not within the scope of the current study. The laboratory  
273 identification of the specific VOC pattern is still in its infancy, but some current studies under  
274 review and also a peer-reviewed one showed SARS-CoV-2 specific biomarkers in breath  
275 samples detectable by gas chromatography-ion mobility spectrometry<sup>27,28</sup>, which also support  
276 our hypothesis. Scent dogs should be considered an addition to the gold standard RT-PCR, for  
277 rapid testing in situations where great numbers of people from different origins come together.  
278 The accuracies may be increased by extending the training phase and selecting individual dogs  
279 with better scent detection accuracy. As with any testing scenario, human and in this case dog  
280 daily performance could vary. This also applies to the most accurate diagnostic performance  
281 of the gold standard RT-PCR that can only be achieved under ideal conditions, which does not  
282 always reflect the real life situation. Peer reviewed and preliminary systematic reviews indicate  
283 PCR sensitivities ranging from 71 to 100%<sup>29,30</sup> implying false negative results ranging up to  
284 29% under real-life conditions.

285 In order to generate rapid test results, a large number of over-the-counter rapid antigen tests are  
286 currently used. Test results are generated within about 15 minutes. According to the  
287 manufacturers, the tests approved in Germany have diagnostic sensitivities between 91 and 98%  
288 and specificities between 98 and 100%<sup>31</sup>. However, the diagnostic accuracy under real-life  
289 conditions is estimated to be much lower under these conditions (pre-prints<sup>32,33</sup>). The Paul  
290 Ehrlich Institute (Langen, Germany) specified minimum criteria for approved rapid antigen test

291 for SARS-CoV-2 infections. They require a diagnostic sensitivity of above 80% and specificity  
292 above 97%<sup>34</sup>. The scent dog method would meet these criteria.

293

## 294 **Conclusions**

295 Detection dogs were able to transfer the conditioned scent detection of BPL-inactivated saliva  
296 samples to non-inactivated saliva, urine and sweat samples, with a sensitivity >80% and  
297 specificity >94%. All three fluids were equally suited for SARS-CoV-2 detection by dogs and  
298 could be used for disease specific VOCs' pattern recognition. Detection dogs may provide a  
299 reliable screening method for SARS-CoV-2 infections in various settings to generate immediate  
300 results that can be verified by the gold standard (RT-PCR). Further work, especially under real-  
301 life conditions in settings where many individuals have to be screened is needed to fully  
302 evaluate the potential of the dog detection method.

303

## 304 **List of abbreviations**

305 RT-PCR: reverse transcription polymerase chain reaction test

306 VOCs: volatile organic compounds

307 DDTS: Dog Detection Training System

308 BPL: beta-propiolactone

309 TP: true positive

310 FP: false positive

311 TN: true negative

312 FN: false negative

313 CI: confidence interval

314 TADD: Training Aid Delivery Device

315

316 **Declarations**

317 **Ethics approval and consent to participate**

318 The study was conducted according to the ethical requirements established by the Declaration  
319 of Helsinki. The local Ethics Committee of *Hannover Medical School* (MHH) and Hamburg  
320 Medical Association for the *University Medical-Center Hamburg-Eppendorf* (UKE) approved  
321 the study (ethic consent number 9042\_BO\_K\_2020 and PV7298, respectively). Written  
322 consent from all participants was collected before sample collection.

323 **Competing interests**

324 The authors declare that they have no competing interests.

325 **Authors' contributions**

326 PJ participated in the planning of the study, carried out the main practical work, data analyses  
327 and drafted the manuscript. FT, SM and HAV designed and coordinated the study, drafted the  
328 manuscript, conducted and coordinated (FT) the sample acquisition and were responsible for  
329 data analyses. MvKB and AbO participated in the planning of the laboratory part of the study  
330 and were in charge for the legal permission for sample processing. CS and VP carried out the  
331 laboratory work including sample preparation, virus inactivation and RT-PCR. JE and HE  
332 programmed the DDTS software and HE was also supporting the dog training. IP, TW, MPM,  
333 AF and MMA were in charge for the ethical approval, patient recruitment and sample  
334 collection (IP, AF) at Hannover Medical School (IP, TW, MPM) and University Medical-  
335 Center Hamburg-Eppendorf (AF, MMA). CE was responsible for the special research  
336 proposal of the German Armed Forces whereas WS was responsible for the general medical  
337 care of the dogs. As project manager on the part of the German Armed Forces, ME  
338 coordinated the cooperation with the University of Veterinary Medicine Hannover. ES was  
339 responsible for the dog training and helped with data analyses. ME and ES were also involved  
340 in designing and coordinating the study. AP, KM and US established and validated the RT-

341 PCR-assays including sampling, sample storage and sample preparation and did the  
342 diagnostics. All authors have read and approved the final manuscript.

### 343 **Acknowledgements**

344 We would like to thank the members of the ID-UKE-COVID-19 Study Group (Amelie Alberti,  
345 Marylyn M. Addo, Etienne Bartels, Thomas T. Brehm, Christine Dahlke, Anahita Fathi,  
346 Monika Friedrich, Svenja Hardtke, Till Koch, Ansgar W. Lohse, My L. Ly, Stefan Schmiedel,  
347 L. Marie Weskamm, Julian Schulze zur Wiesch) at the University Medical-Center Hamburg-  
348 Eppendorf by helping us with recruitment of patients and sample collection. We further would  
349 like to thank Sina Knisel, Carlos Acosta, Robert Zacharz, Christian Mertel, Pascal Baum,  
350 Matthias Wichow, and Jannik Hofmann for support at the University of Veterinary Medicine  
351 Hannover, Germany during dog training and Leander Buchner from Bundeswehr Medical  
352 Service Headquarters, German Armed Forces, Germany for the support in getting samples. A  
353 special thanks goes to Hans Ebberts, Kynoscience, for the support regarding the DDTS. Special  
354 thanks go to our “doggy noses” Donnie, Lotta, Coyote, Füge, Vine, Filou, Bellatrix, Margo,  
355 Erec Junior and Floki. We would also like to thank Rouwen Stucke and Katharina Meyer for  
356 their support in the laboratory and Karin Lübbert for her technical assistance. Heartfelt thanks  
357 go to all the people providing us with samples, especially to the SARS-CoV-2 infected persons  
358 and their relatives with the sincere intention to contribute to the containment of COVID-19 and  
359 to scientific progress. We wish you lots of strength and full recovery during the current  
360 pandemic.

361

### 362 **References**

- 363 1. Velavan TP, Meyer CG. The COVID-19 epidemic. *Trop Med Int Heal*. 2020;**25**(3):278–80.  
364 doi: 10.1111/tmi.13383
- 365 2. Bhat TA, Kalathil SG, Bogner PN, Blount BC, Goniewicz ML, Thanavala YM. SARS-CoV-2  
366 Viral Load in Upper Respiratory Specimens of Infected Patients. *N Engl J Med*.  
367 2020;**382**(12):1175–7. doi: 10.1056/NEJMc2001737



- 368 3. Chan JFW, Yuan S, Kok KH, To KKW, Chu H, Yang J, et al. A familial cluster of pneumonia  
369 associated with the 2019 novel coronavirus indicating person-to-person transmission: a study  
370 of a family cluster. *Lancet*. 2020;**395**(10223):514–23. doi: 10.1016/S0140-6736(20)30154-9
- 371 4. Huang C, Wang Y, Li X, Ren L, Zhao J, Hu Y, et al. Clinical features of patients infected with  
372 2019 novel coronavirus in Wuhan, China. *Lancet*. 2020;**395**(10223):497–506. doi:  
373 10.1016/S0140-6736(20)30183-5
- 374 5. To KK-W, Tsang OT-Y, Yip CC-Y, Chan K-H, Wu T-C, Chan JM-C, et al. Consistent  
375 Detection of 2019 Novel Coronavirus in Saliva. *Clin Infect Dis*. 2020;(Xx Xxxx):4–6. doi:  
376 10.1093/cid/ciaa149
- 377 6. To KKW, Tsang OTY, Leung WS, Tam AR, Wu TC, Lung DC, et al. Temporal profiles of  
378 viral load in posterior oropharyngeal saliva samples and serum antibody responses during  
379 infection by SARS-CoV-2: an observational cohort study. *Lancet Infect. Dis*. 2020;**3099**:1–10.  
380 doi: 10.1016/S1473-3099(20)30196-1
- 381 7. Wang W, Xu Y, Gao R, Lu R, Han K, Wu G, et al. Detection of SARS-CoV-2 in Different  
382 Types of Clinical Specimens. *JAMA - J Am Med Assoc*. 2020;3–4. doi:  
383 10.1001/jama.2020.3786
- 384 8. He X, Lau EHY, Wu P, Deng X, Wang J, Hao X, et al. Temporal dynamics in viral shedding  
385 and transmissibility of COVID-19. *Nat. Med*. 2020;**26**:672–675. doi: 10.1038/s41591-020-  
386 0869-5
- 387 9. Brönimann S, Rebhan K, Lemberger U, Misrai V, Shariat SF, Pradere B. Secretion of severe  
388 acute respiratory syndrome coronavirus 2 in urine. *Curr Opin Urol*. 2020;**30**(5):735–9. doi:  
389 10.1097/MOU.0000000000000808
- 390 10. Fathizadeh H, Taghizadeh S, Safari R, Shabestari S. Microbial Pathogenesis Study presence of  
391 COVID-19 ( SARS-CoV-2 ) in the sweat of patients infected with Covid-19.  
392 2020;149(September). doi: 10.1016/j.micpath.2020.104556
- 393 11. Amann A, Costello BDL, Miekisch W, Schubert J, Buszewski B, Pleil J, et al. The human  
394 volatilome: Volatile organic compounds (VOCs) in exhaled breath, skin emanations, urine,  
395 feces and saliva. *J Breath Res*. 2014;**8**(3).

- 396 12. Angle C, Waggoner LP, Ferrando A, Haney P, Passler T. Canine detection of the volatilome: A  
397 review of implications for pathogen and disease detection. *Front Vet Sci.* 2016;**3**(JUN):1–7.  
398 doi: 10.3389/fvets.2016.00047
- 399 13. Reeve C, Koivusalo M. Biomedical Scent Detection Dogs: Would They Pass as a Health  
400 Technology? *Pet Behav Sci.* 2018;**6**(6):1–7. doi: 10.21071/pbs.v0i6.10785
- 401 14. McCulloch M, Jezierski T, Broffman M, Hubbard A, Turner K, Janecki T. Diagnostic accuracy  
402 of canine scent detection in early- and late-stage lung and breast cancers. *Integr Cancer Ther*  
403 2006;**5**:30–9. doi: 10.1177/1534735405285096
- 404 15. Guest C, Pinder M, Doggett M, Squires C, Affara M, Kandeh B, et al. Trained dogs identify  
405 people with malaria parasites by their odour. *Lancet Infect Dis.* 2019;**19**(6):578–80. doi:  
406 10.1016/S1473-3099(19)30220-8
- 407 16. Taylor MT, McCreedy J, Broukhanski G, Kirpalaney S, Lutz H, Powis J. Using dog scent  
408 detection as a point-of-care tool to identify toxigenic *clostridium difficile* in stool. *Open Forum*  
409 *Infect Dis.* 2018;**5**(8):1–4. doi: 10.1093/ofid/ofy179
- 410 17. Fischer-Tenhagen C, Theby V, Krömker V, Heuwieser W. Detecting *Staphylococcus aureus* in  
411 milk from dairy cows using sniffer dogs. *J Dairy Sci.* 2018;**101**(5):4317–24. doi:  
412 10.3168/jds.2017-14100
- 413 18. Rooney NJ, Guest CM, Swanson LCM, Morant S V. How effective are trained dogs at alerting  
414 their owners to changes in blood glycaemic levels?: Variations in performance of glycaemia  
415 alert dogs. *PLoS One.* 2019;**14**(1):1–16. doi: 10.1371/journal.pone.0210092
- 416 19. Aksenov AA, Sandrock CE, Zhao W, Sankaran S, Schivo M, Harper R, et al. Cellular scent of  
417 influenza virus infection. *ChemBioChem.* 2014;**15**(7):1040–8. doi: 10.1002/cbic.201300695
- 418 20. Grandjean D, Sarkis R, Lecoq-Julien C, Benard A, Roger V, Levesque E. Can the detection  
419 dog alert on COVID-19 positive persons by sniffing axillary sweat samples? A proof-of-  
420 concept study. *PLoS ONE* 2020;**15**(12): e0243122. doi: <https://doi.org/10.1371/journal.pone.0243122>
- 421
- 422 21. Vesga O, Valencia AF, Mira A, Ossa F, Ocampo E, Agudelo M. Dog Savior: Immediate Scent-  
423 Detection of SARS-COV-2 by Trained Dogs. *bioRxiv* 2020. doi:

- 424 <https://doi.org/10.1101/2020.06.17.158105> .
- 425 22. Institut Pasteur, Paris. Protocol: Real-time RT-PCR assays for the detection of SARS-CoV-2.  
426 2020 Mar. Available from: [https://www.who.int/docs/default-source/coronaviruse/real-time-rt-  
427 pcr-assays-for-the-detection-of-sars-cov-2-institut-pasteur-paris.pdf?sfvrsn=3662fcb6\\_2](https://www.who.int/docs/default-source/coronaviruse/real-time-rt-<br/>427 pcr-assays-for-the-detection-of-sars-cov-2-institut-pasteur-paris.pdf?sfvrsn=3662fcb6_2).  
428 Accessed 31 Mar 2020.
- 429 23. Hoffmann B, Depner K, Schirrmeyer H, Beer M. A universal heterologous internal control system  
430 for duplex real-time RT-PCR assays used in a detection system for pestiviruses. *J Virol Methods*.  
431 2006;136:200–9. doi: 10.1016/j.jviromet.2006.05.020
- 432 24. Jendry P, Schulz C, Twele F, Meller S, Von Köckritz-Blickwede M, Osterhaus ADME, et al.  
433 Scent dog identification of samples from COVID-19 patients - A pilot study. *BMC Infect Dis*.  
434 2020;**20**(1):1–7. doi: 10.1186/s12879-020-05281-3
- 435 25. Trevethan R. Sensitivity, Specificity, and Predictive Values: Foundations, Plabilities, and  
436 Pitfalls in Research and Practice. 2017;**5**(November):1–7. doi: 10.3389/fpubh.2017.00307
- 437 26. Newcombe RG. Interval estimation for the difference between independent proportions:  
438 Comparison of eleven methods. *Stat. Med*. 1998;**17**:873–890. doi: 10.1002/(SICI)1097-  
439 0258(19980430)17:8<873::AID-SIM779>3.0.CO;2-I
- 440 27. Ruszkiewicz DM, Sanders D, O'Brien R, Hempel F, Reed MJ, Riepe AC, et al. Diagnosis of  
441 COVID-19 by analysis of breath with gas chromatography-ion mobility spectrometry - a  
442 feasibility study. *EClinicalMedicine* 2020; **29–30**:100609. doi: 10.1016/j.eclinm.2020.100609
- 443 28. Steppert C, Steppert I, Becher G, Sterlacci W, Bollinger T. Rapid detection of SARS-CoV-2  
444 infection by multicapillary column coupled ion mobility spectrometry (MCC-IMS) of breath. A  
445 proof of concept study. medRxiv preprint 2020 doi:  
446 <https://doi.org/10.1101/2020.06.30.20143347> .
- 447 29. Woloshin M. . False Negative Tests for SARS-CoV-2 Infection — Challenges and  
448 Implications. *N. Engl. J. Med*. 2010;**38**:1489–1491. doi: 10.1056/NEJMp2015897
- 449 30. Cohen AN, Kessel B. False positives in reverse transcription PCR testing for SARS-CoV-2.  
450 medRxiv preprint 2020 doi: <https://doi.org/10.1101/2020.04.26.20080911>
- 451 31. <https://antigentest.bfarm.de/ords/antigen/r/antigentests-auf-sars-cov-2/liste-der->

- 452 antigenests?session=14296491677146&tz=1:00 (accessed at Jan 19, 2021)
- 453 32. Krüger LJ, Gaeddert M, Köppel L, Brümmer E, Gottschalk C, Miranda IB, et al. Evaluation of  
454 the accuracy, ease of use and limit of detection of novel, rapid, antigen-detectingpoint-of-care  
455 diagnostics for SARS-CoV-2. medRxiv 2020. doi:  
456 <https://doi.org/10.1101/2020.10.01.20203836>
- 457 33. Berger A, Nsoga MTN, Perez-Rodriguez FJ, Abi Aad Y, Sattonnet-Roche P, Gayet-Ageron A,  
458 et al. medRxiv 2020. doi: <https://doi.org/10.1101/2020.11.20.20235341>
- 459 34. [https://www.pei.de/SharedDocs/Downloads/EN/newsroom-en/dossiers/minimum-criteria-for-](https://www.pei.de/SharedDocs/Downloads/EN/newsroom-en/dossiers/minimum-criteria-for-rapid-sars-cov2-antigen-tests-01-12-2020.pdf?__blob=publicationFile&v=3)  
460 [rapid-sars-cov2-antigen-tests-01-12-2020.pdf?\\_\\_blob=publicationFile&v=3](https://www.pei.de/SharedDocs/Downloads/EN/newsroom-en/dossiers/minimum-criteria-for-rapid-sars-cov2-antigen-tests-01-12-2020.pdf?__blob=publicationFile&v=3) (accessed at Jan  
461 19, 2021)
- 462
- 463
